# Supplementary material for: Selective bacterial separation of critical metals: towards a sustainable method for recycling lithium ion batteries
Source: Royal Society of Chemistry journal article supplement (doi:10.1039/d2gc02450k), 2022-01-01
Supplement: d2gc02450k1.pdf [file d2gc02450k1.pdf]

## Supplementary Information

### Selective bacterial separation of critical metals: towards a sustainable method for recycling lithium ion batteries

Virginia Echavarri-Bravo<sup>a,e</sup>, Houari Amari<sup>†b,e</sup>, Jennifer Hartley<sup>c,e</sup>, Giovanni Maddalena<sup>a,e</sup>, Caroline Kirk<sup>d</sup>, Maarten W. Tuijtel<sup>§a</sup>, Nigel. D. Browning<sup>b,e,f,g</sup>, Louise E. Horsfall<sup>\*a,e</sup>

<sup>a</sup>School of Biological Sciences, University of Edinburgh, Edinburgh, EH9 3FF, UK.

<sup>b</sup>Department of Mechanical, Materials and Aerospace Engineering, University of Liverpool, Liverpool, L69 3GQ, UK.

<sup>c</sup>School of Chemistry, University of Leicester, Leicester, LE1 7RH, UK.

<sup>d</sup>School of Chemistry, University of Edinburgh, Edinburgh, EH9 3FJ, UK

<sup>e</sup>Faraday Institution (ReLiB project), Quad One, Harwell Science and Innovation Campus, Didcot, UK

<sup>f</sup>Sivananthan Laboratories, 590 Territorial Drive, Bolingbrook, IL 60440, USA

<sup>g</sup>Physical and Computational Sciences Directorate, Pacific Northwest National Laboratory, P.O. Box 999, Richland, WA 99352, USA

<sup>†</sup>Present address: Leibniz Institute for Crystal Growth, Max-Born-Str. 2, 12489 Berlin, Germany.

<sup>§</sup>Present address: Department of Structural Biology, Max Planck Institute of Biophysics, Max-von-Laue Strasse 3, 60438 Frankfurt am Main, Germany;

\*Corresponding author. Email: Louise.Horsfall@ed.ac.uk

#### Contents of this document

|                                                                 |    |
|-----------------------------------------------------------------|----|
| Fig. S1.....                                                    | 2  |
| Fig. S2.....                                                    | 2  |
| Proteomic analysis of the bacterial response to Ni and Co ..... | 1  |
| Fig. S3.....                                                    | 2  |
| Fig. S4.....                                                    | 3  |
| Fig. S5.....                                                    | 3  |
| Fig. S6.....                                                    | 4  |
| Fig. S7.....                                                    | 4  |
| Fig. S8.....                                                    | 5  |
| Table S1. ....                                                  | 6  |
| Table S2. ....                                                  | 7  |
| Table S3. ....                                                  | 8  |
| Fig.S9.....                                                     | 8  |
| Table S4. ....                                                  | 9  |
| Fig.S10.....                                                    | 9  |
| Table S5. ....                                                  | 10 |
| Fig. S11.....                                                   | 11 |
| References.....                                                 | 11 |

Other Supplementary Data for this manuscript include the following:

Proteomics data can be accessed at <https://doi.org/10.7488/ds/3130>.

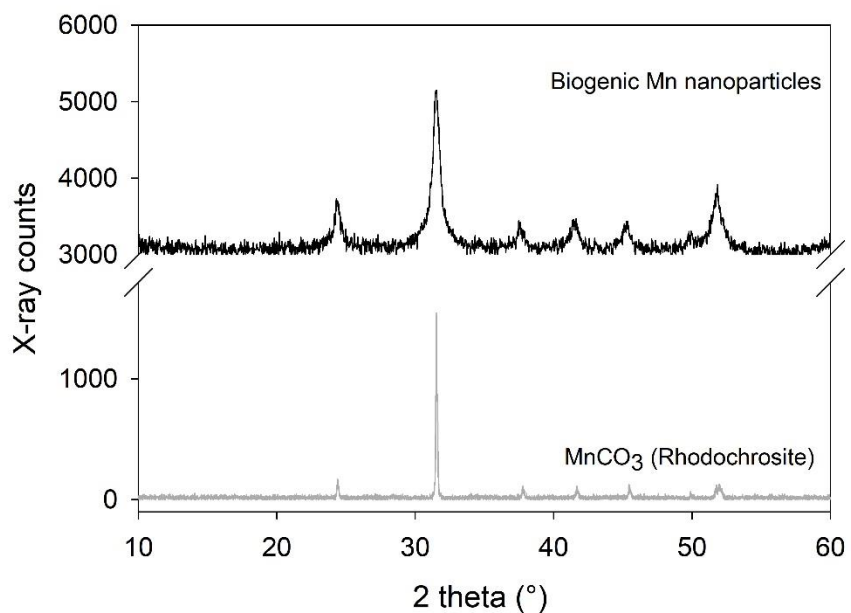

**Fig. S1** XRPD data comparing the bioprecipitated Mn as  $\text{MnCO}_3$  with a standard pattern of  $\text{MnCO}_3$ .

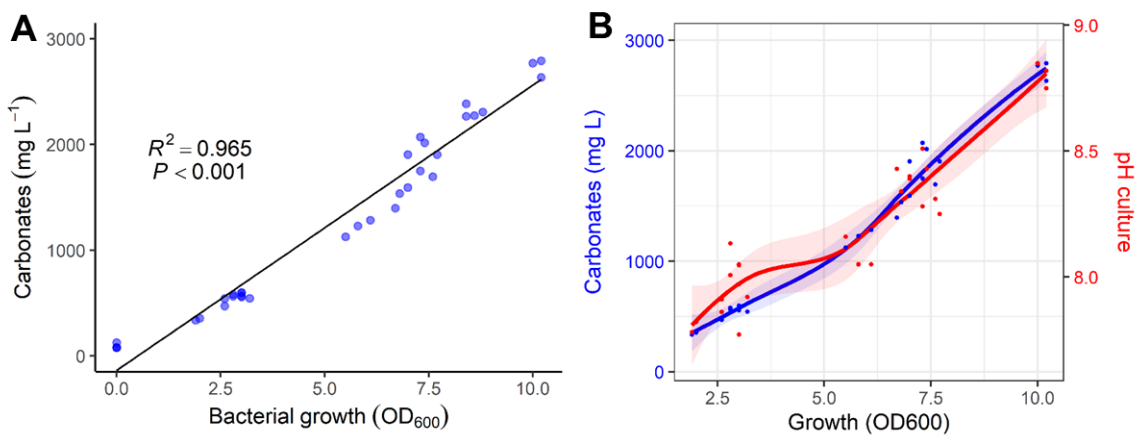

**Fig. S2 (A)** Linear correlation between bacterial growth measured as  $\text{OD}_{600}$  and carbonate production and **(B)** evolution of carbonate concentration and pH with bacterial growth ( $\text{OD}_{600}$ ).

## Proteomic analysis of the bacterial response to Ni and Co

### Methodology

Proteomics analysis was designed based on the removal rates of Co and Ni and considered the following factors: 1) three different metal combinations, single metal treatments (only Co<sup>2+</sup> or Ni<sup>2+</sup>) and bimetallic (Co<sup>2+</sup> and Ni<sup>2+</sup> at equal concentrations) to mimic the removal experiments; 2) two different metal concentration levels (10 and 100 ppm) and 3) two different time points (2 and 20 h) to investigate the dynamics of proteins production.

*D. alaskensis* G20 cultures for proteomic analysis were grown and washed in MOPS buffer similarly to the metal removal studies and previous proteomics analysis with this organism.<sup>1</sup> After 2 and 20 h incubation cell cultures were collected by centrifugation, the supernatants discarded and cell pellets stored at -75 °C until proteomic analysis.

**ESI-HPLC-MS/MS analysis** Samples were reconstituted in 8 M urea and protein concentration was determined by Bradford protein assay (Biorad). 30µg of samples were digested using S-Trap™ (Protifi) following manufacturers protocol. After speed-vacuum drying, peptide samples were re-suspended in MS-loading buffer (0.05% v/v trifluoroacetic acid in water) to 1µg µl<sup>-1</sup> final concentration and then filtered using Millex filter before HPLC-MS analysis. 5µl of a 1 to 1 dilution (in 0.05% TFA) was injected for analysis. Nano-ESI-HPLC-MS/MS analysis was performed using an online system, the nano-HPLC (Dionex Ultimate 3000 RSLC, Thermo-Fisher) coupled to a QExactive mass spectrometer (Thermo-Fisher) with a 300µm x 5 mm pre-column (Acclaim Pepmap, 5µm particle size) joined with a 75 µm x 50 cm column (EASY-Spray, 3 µm particle size). The nano-pump was run using solvent A (2% Acetonitrile in water 0.1% formic acid) and solvent B (80% acetonitrile, 20% water and 0.1% formic acid) and peptides were separated using a multi-step gradient of 2–98% buffer B at a flow rate of 300 nl min<sup>-1</sup> over 90 minutes.

**Data process and analysis** Progenesis (version 4 Nonlinear Dynamics, UK) was used for LC-MS label-free quantitation and data normalisation and analysis. Filtering was carried out so that only MS/MS peaks with positive charges of 2, 3 or 4 were taken into account for the total number of 'features' (signal at one particular retention time and m/z) and only the five most intense spectra per 'feature' were included. MS/MS spectra was searched using MASCOT Version 2.4 (Matrix Science Ltd, UK) against a custom *D. alaskensis* G20 database with maximum missed-cut value set to 2 as in previous proteomics work with this organism.<sup>1</sup> For convention the protein identifier (protein ID) used in the present work has been given the name of its encoding gene which starts with letters "Dde\_" followed by four numeric digits. The updates related to genes and protein annotations can be found at the KEGG database (<https://www.genome.jp/kegg/>). From the Progenesis exported results sheet, differentially expressed proteins were considered significant if the p-value was less than 0.05 (ANOVA) and if the number of peptides used in quantitation per protein was equal to or more than 2. Heat maps were created using R (<https://cran.r-project.org/>) after log<sub>10</sub> transformation of the normalised abundance data sets.

### Proteomics results

To fully develop our understanding of a biological separation process we investigated the biological molecules and mechanisms responsible for Co and Ni nanoparticle synthesis. The proteins produced by *D. alaskensis* G20 after incubation with Co<sup>2+</sup> and/or Ni<sup>2+</sup> were analysed by Electrospray Ionisation Mass Spectrometry (ESI)-HPLC-MS/MS. 1579 proteins were identified in this study which corresponds to 52% of the total proteome of *D. alaskensis* G20,<sup>2</sup> providing comprehensive coverage of the bacterial response to the presence of these two transition metals, relative to previous studies.<sup>3,4</sup>

After 2 h incubation there was a remarkable reduction in the protein abundance in treatments containing 100 ppm of Ni<sup>2+</sup> in comparison to the control. It is also particularly noteworthy that metal-binding proteins, such as the UPF0173 metal-dependent hydrolase (Dde\_0151), the quinone-interacting membrane-bound oxidoreductase (Dde\_1113) and the MJ0042 family finger-like protein (Dde\_1116), showed the highest abundance in the presence of 100 ppm Co<sup>2+</sup> and yet the lowest abundance for the 100 ppm bimetallic treatment (Fig. S3B). UPF0173 metal-dependent hydrolases and MJ0042 family finger-like proteins are known for binding Zn<sup>2+</sup> that can be exchanged by Co<sup>2+</sup> without a loss of functionality.<sup>5,6</sup> To reduce the risk of mis-metallation with Ni, or perhaps to remedy such, it is understandable that a decrease in their abundance is observed and this might then also explain why Co removal from the dissolved fraction dropped when Ni<sup>2+</sup> was present at concentrations ≥ 50 ppm.

After 20 h incubation, 23 proteins showed higher abundance in the treatment with Ni<sup>2+</sup> compared to the Control and Co<sup>2+</sup> treatments (Fig. S3C). Some of these proteins are likely responsible for mediating Ni<sup>2+</sup> toxicity, such as the zinc resistance-associated protein (Dde\_0111) which belongs to a family of four-helix hooked hairpins.<sup>7</sup> Also proteins that might be involved in metal reduction processes such as oxidoreductases,<sup>8,9</sup> were significantly more abundant after 20 h incubation with 10 ppm of Ni<sup>2+</sup> compared to the treatment with Co<sup>2+</sup>, confirming a distinctive cellular response depending on the metal. Some of these oxidoreductases, such as the FAD/NAD (P)-binding domain protein (Dde\_1381) and the FAD-dependent pyridine nucleotide-disulfide oxidoreductase (Dde\_2176), classified within the xenobiotics biodegradation and metabolism pathways, might be responsible for reducing Ni<sup>2+</sup> into a less toxic form of this metal.

We identified similar cellular responses to  $\text{Co}^{2+}$ , and  $\text{Ni}^{2+}$ , with regard to ABC transporters as the periplasmic component of zinc ABC transporter protein (Dde\_2208) and the Molybdenum ABC transporter (Dde\_0155), were both more abundant in the presence of any metal treatment compared to the control. Dde\_0155 had been identified in previous work with *D. alaskensis* G20 after incubation with  $\text{Pd}^{2+}$  and  $\text{Pt}^{4+}$  suggesting that this protein is a key component of heavy metal detoxification pathways.<sup>10</sup> Conversely, other proteins related to the ABC transporter pathways were found at significantly larger concentrations after incubation with  $\text{Co}^{2+}$  alone than after treatments containing  $\text{Ni}^{2+}$ . These were two periplasmic subunit family 3 proteins, Dde\_0168 (Fig. S3A-B) and Dde\_1429 (Fig. S3A) related to export mechanisms and the cell division ATP-binding FtsE protein (Dde\_0114) (Fig. S3A-B).<sup>1</sup>

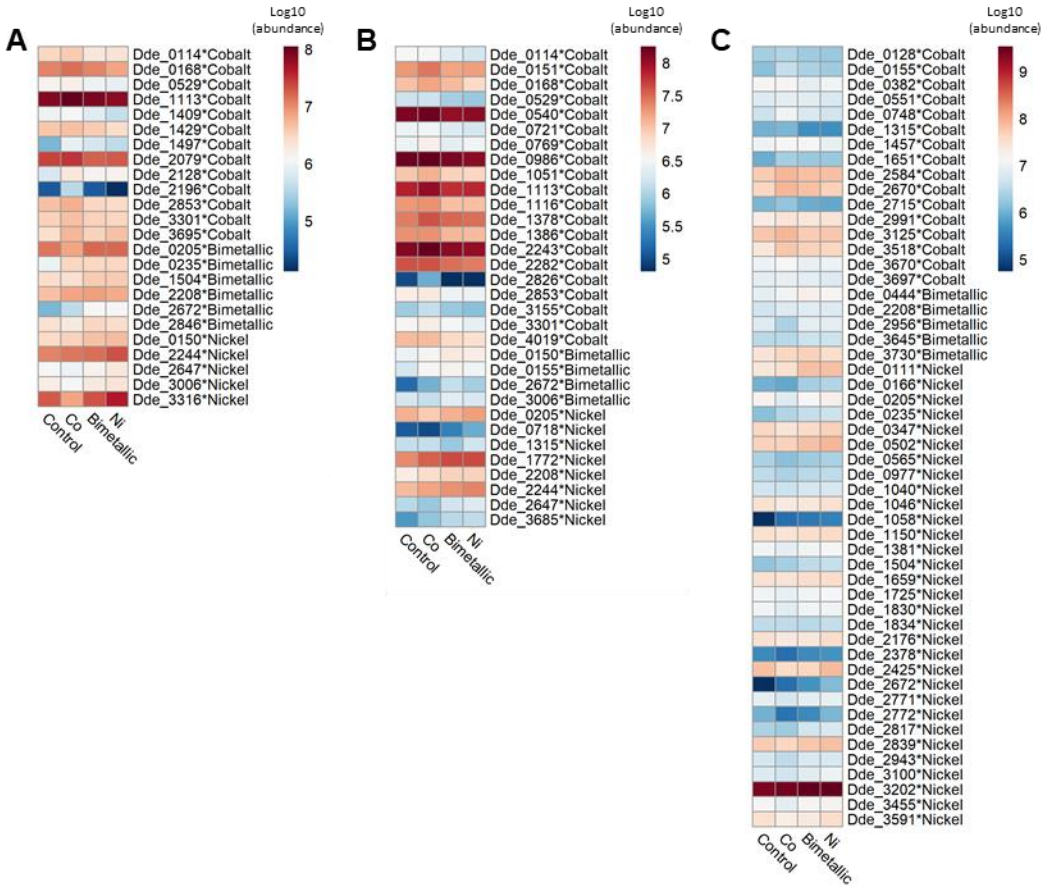

**Fig. S3** Proteomics analysis. Heat maps of proteins abundance associated to the control and metal treatments (Co, Ni and bimetallic) after 2 h incubation with metals at (A) 10 ppm and (B) 100 ppm and (C) after 20 h incubation with metals at 10 ppm. Values are represented as the log 10 (Mean protein abundance, n=3 biological replicates). Rows are labelled with the protein identifier Dde\_##### followed by the \*metal treatment exhibiting the highest significant abundance (ANOVA, p-value <0.05, number of peptides detected  $\geq 2$ , absolute ratio abundance > 1.5-fold). The protein abundance, ANOVA results and full name of the proteins together with their associated ID is available at <https://doi.org/10.7488/ds/3130>.

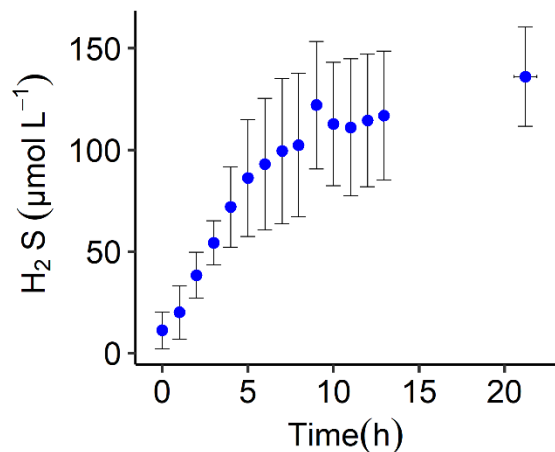

**Fig. S4** Dissolved H<sub>2</sub>S (Mean ± SD, n=3 biological replicates) measured over time in *D. alaskensis* G20 cell cultures in the absence of metals (control treatment).

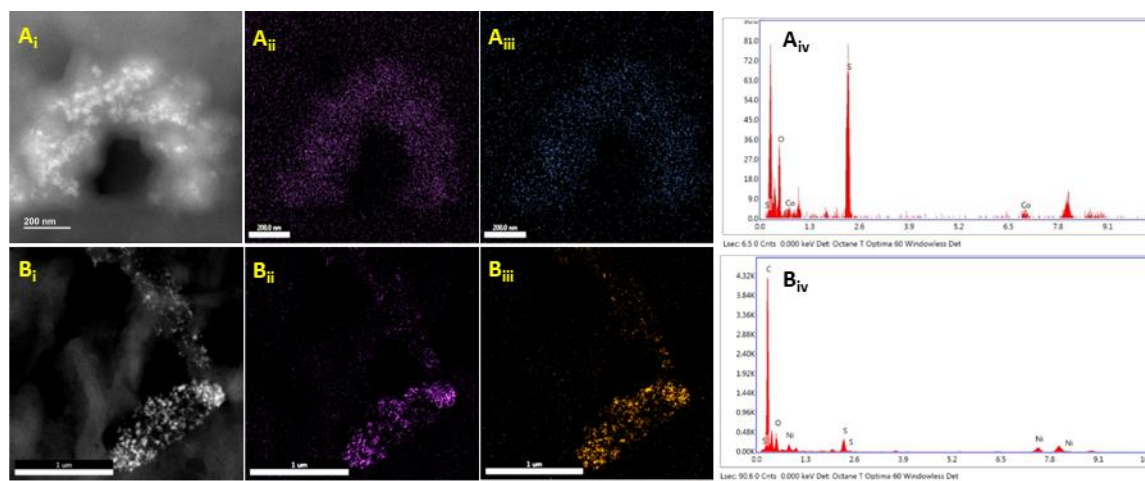

**Fig. S5** STEM+EDX characterisation of *D. alaskensis* G20 incubated with Co<sup>2+</sup> and Ni<sup>2+</sup>. (A<sub>i</sub>) STEM image of samples of *D. alaskensis* G20 incubated for 20 h in Co<sup>2+</sup> 10 ppm, and re-suspended at a final concentration of EtOH 50 % v/v. (A<sub>ii</sub>) EDXS elemental map for sulfur (A<sub>iii</sub>) EDXS elemental map for Co and (A<sub>iv</sub>) the related EDXS spectra, scale bar (A<sub>i</sub>- A<sub>iii</sub>) = 200 nm. (B<sub>i</sub>) STEM image of samples of *D. alaskensis* G20 incubated for 20 h with Ni<sup>2+</sup> 10 ppm, and re-suspended at a final concentration of EtOH 50 % v/v. (B<sub>ii</sub>) EDXS elemental map for sulphur (B<sub>iii</sub>) EDXS elemental map for Ni and (B<sub>iv</sub>) the related EDXS spectra, scale bar (B<sub>i</sub>- B<sub>iii</sub>) = 1µm.

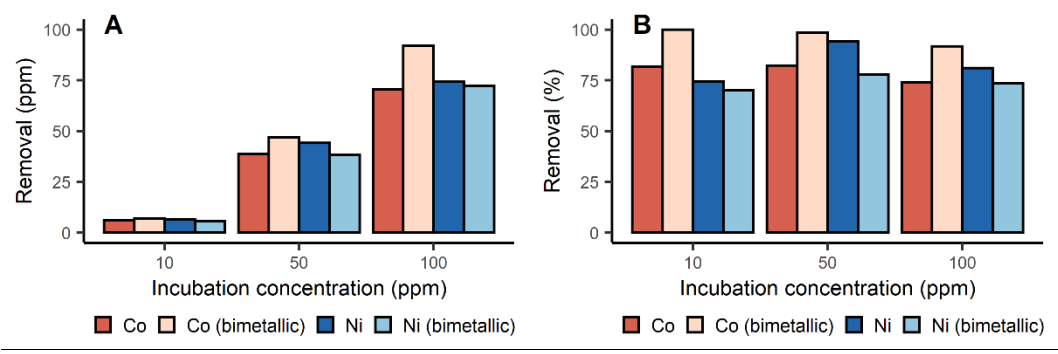

**Fig. S6** Removal of  $\text{Co}^{2+}$  and  $\text{Ni}^{2+}$  measured as (A) ppm and (B) percentage with cell-free supernatant of *D. alaskensis* G20 cultures, n=1.

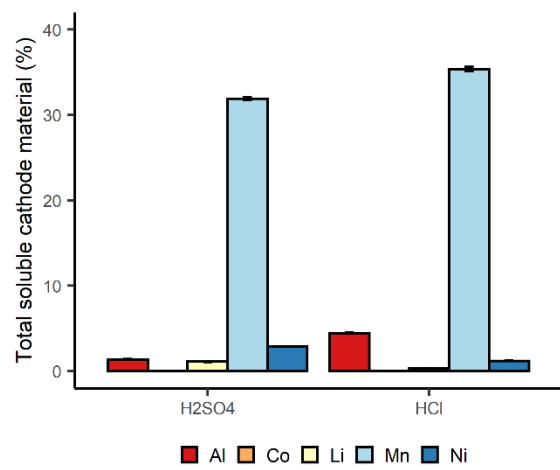

**Fig. S7** Total soluble cathode leached (B1C) incubated for 5 h at 20 °C with 1 M of  $\text{H}_2\text{SO}_4$  and  $\text{HCl}$ , expressed as the Mean (%) (n=2).

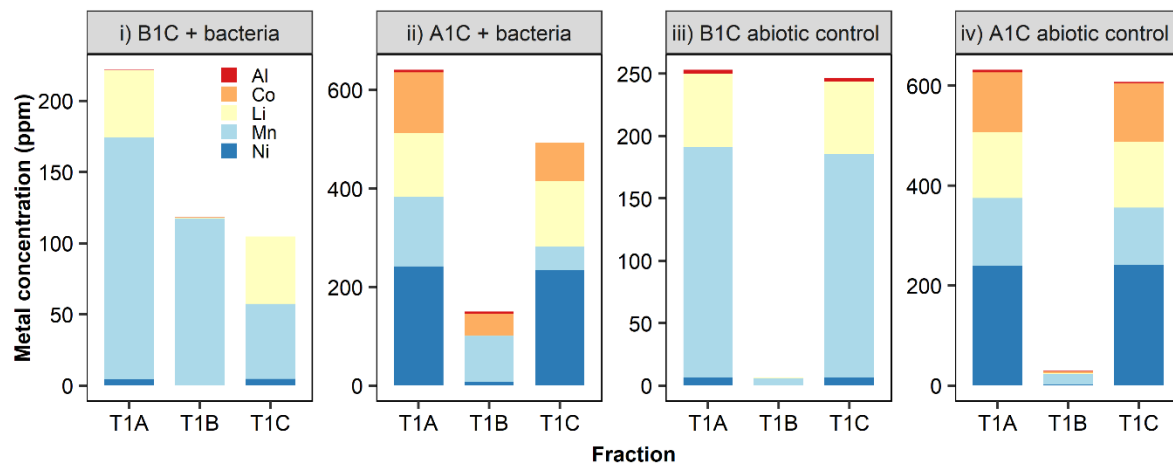

**Fig. S8** Bioprecipitation of metals contained in vehicular LIBs using *S. oneidensis* MR-1. Leachates were obtained from B1C and A1C cathode material treated with 0.5 M H<sub>2</sub>SO<sub>4</sub> at 50 °C using (i-ii) *S. oneidensis* MR-1 cell culture (mean value, n=3 biological replicates) and (iii-iv) LBNS medium as abiotic control (n=2 technical replicates).

**Table S1.** Dissolved metal concentration (ppm) in leachates incubated with *S. oneidensis* MR-1

| Element                           | 0.1M H <sub>2</sub> SO <sub>4</sub> ;<br>A1C<br>(5' at 50 °C) | 0.1M H <sub>2</sub> SO <sub>4</sub> ;<br>A1C<br>(30' at 50 °C) | 0.1M H <sub>2</sub> SO <sub>4</sub> ;<br>B1C<br>(5' at 50 °C) | 0.1M H <sub>2</sub> SO <sub>4</sub> ;<br>B1C<br>(30' at 50 °C) | 0.1M HCl;<br>B1C<br>(5' at 20 °C) | 0.1M HCl;<br>B1C<br>(300' at 20 °C) |
|-----------------------------------|---------------------------------------------------------------|----------------------------------------------------------------|---------------------------------------------------------------|----------------------------------------------------------------|-----------------------------------|-------------------------------------|
| Al                                | 1.16                                                          | 5.01                                                           | 3.56                                                          | 11.2                                                           | 12.2                              | 42.9                                |
| Co                                | 36.3                                                          | 73.4                                                           | 0.00                                                          | 4.14                                                           | 0.00                              | 0.00                                |
| Li                                | 41.6                                                          | 77.9                                                           | 32.0                                                          | 64.0                                                           | 5.99                              | 17.2                                |
| Mn                                | 47.2                                                          | 83.6                                                           | 108                                                           | 206                                                            | 45.0                              | 119                                 |
| Ni                                | 67.5                                                          | 143                                                            | 4.55                                                          | 39.5                                                           | 0.00                              | 0.07                                |
| <b>Total metal mass<br/>(ppm)</b> | 194                                                           | 383                                                            | 148                                                           | 325                                                            | 63.1                              | 179                                 |



**Table S2.** Metal removal from LIBs leachates after incubation with *S. oneidensis* MR-1

| Leachate                                                      | Element      | Removal (ppm ) |        | Removal (%) |       | Precipitated Mass (%) |
|---------------------------------------------------------------|--------------|----------------|--------|-------------|-------|-----------------------|
|                                                               |              | Mean           | SD     | Mean        | SD    |                       |
| 0.1 M H <sub>2</sub> SO <sub>4</sub><br>A1C<br>(5' at 50 °C)  | Al           | 0.09           | 0.08   | 8.00        | 7.05  | 0.38                  |
|                                                               | Co           | 0.49           | 0.48   | 1.35        | 1.29  | 2.06                  |
|                                                               | Li           | 0.04           | 0.07   | 0.09        | 0.16  | 0.16                  |
|                                                               | Mn           | 23.24          | 3.89   | 49.36       | 9.12  | 97.20                 |
|                                                               | Ni           | 0.05           | 0.08   | 0.07        | 0.12  | 0.19                  |
|                                                               | <b>Total</b> |                | 23.91  |             | 12.34 |                       |
| 0.1 M H <sub>2</sub> SO <sub>4</sub><br>A1C<br>(30' at 50 °C) | Al           | 2.69           | 0.80   | 53.96       | 16.44 | 5.37                  |
|                                                               | Co           | 6.72           | 1.30   | 9.20        | 2.02  | 13.39                 |
|                                                               | Li           | 0.04           | 0.06   | 0.05        | 0.08  | 0.07                  |
|                                                               | Mn           | 39.49          | 13.53  | 47.41       | 16.88 | 78.63                 |
|                                                               | Ni           | 1.28           | 1.77   | 0.87        | 1.19  | 2.54                  |
|                                                               | <b>Total</b> |                | 50.22  |             | 13.12 |                       |
| 0.1 M H <sub>2</sub> SO <sub>4</sub><br>B1C<br>(5' at 50 °C)  | Al           | 1.03           | 0.65   | 28.75       | 17.88 | 1.61                  |
|                                                               | Co           | 0.00           | 0.00   | 0.00        | 0.00  | 0.00                  |
|                                                               | Li           | 0.09           | 0.15   | 0.27        | 0.47  | 0.14                  |
|                                                               | Mn           | 62.75          | 27.69  | 57.94       | 25.01 | 98.25                 |
|                                                               | Ni           | 0.00           | 0.00   | 0.00        | 0.00  | 0.00                  |
|                                                               | <b>Total</b> |                | 63.87  |             | 43.20 |                       |
| 0.1 M H <sub>2</sub> SO <sub>4</sub><br>B1C<br>(30' at 50 °C) | Al           | 7.83           | 1.56   | 69.87       | 12.01 | 4.70                  |
|                                                               | Co           | 0.86           | 0.15   | 20.82       | 3.02  | 0.52                  |
|                                                               | Li           | 2.98           | 3.07   | 4.65        | 4.87  | 1.79                  |
|                                                               | Mn           | 153.88         | 1.82   | 74.79       | 2.21  | 92.49                 |
|                                                               | Ni           | 0.83           | 0.95   | 2.06        | 2.34  | 0.50                  |
|                                                               | <b>Total</b> |                | 166.38 |             | 51.24 |                       |
| 0.1 M HCl<br>B1C<br>(5' at 20 °C)                             | Al           | 8.98           | 0.45   | 74.53       | 10.88 | 30.40                 |
|                                                               | Co           | 0.00           | 0.00   | 0.00        | 0.00  | 0.00                  |
|                                                               | Li           | 0.01           | 0.02   | 0.19        | 0.34  | 0.04                  |
|                                                               | Mn           | 20.55          | 5.78   | 45.83       | 13.64 | 69.56                 |
|                                                               | Ni           | 0.00           | 0.00   | 0.00        | 0.00  | 0.00                  |
|                                                               | <b>Total</b> |                | 29.54  |             | 46.78 |                       |
| 0.1 M HCl<br>B1C<br>(300' at 20 °C)                           | Al           | 39.84          | 0.79   | 92.99       | 3.81  | 32.10                 |
|                                                               | Co           | 0.00           | 0.00   | 0.00        | 0.00  | 0.00                  |
|                                                               | Li           | 0.26           | 0.17   | 1.50        | 0.94  | 0.21                  |
|                                                               | Mn           | 84.02          | 6.37   | 70.87       | 5.45  | 67.69                 |
|                                                               | Ni           | 0.01           | 0.01   | 3.59        | 6.23  | 0.01                  |
|                                                               | <b>Total</b> |                | 124.13 |             | 69.48 |                       |

n=3 biological replicates

**Table S3.** Metal concentration (ppm) in the different fractions during T1 and T2 of leachate B1C 0.5 M H<sub>2</sub>SO<sub>4</sub>

| Data associated to Fig. 8A-i |      |      |      |             |
|------------------------------|------|------|------|-------------|
| Element                      | T1A  | T1B  | T1C  | Removal (%) |
| Al                           | 9.88 | 3.15 | 6.74 | 31.8        |
| Co                           | 4.22 | 0.00 | 4.29 | 0.00        |
| Li                           | 79.2 | 0.0  | 79.4 | 0.00        |
| Mn                           | 207  | 186  | 21.1 | 89.8        |
| Ni                           | 42.5 | 0.00 | 43.0 | 0.00        |

  

| Data associated to Fig. 8A-ii 25 % v/v leachate |                 |      |      |      |      |      |            |      |      |
|-------------------------------------------------|-----------------|------|------|------|------|------|------------|------|------|
| Element                                         | Cell-only (n=3) |      |      |      |      |      | MOPS (n=1) |      |      |
|                                                 | T2A             |      | T2B  |      | T2C  |      | T2A        | T2B  | T2C  |
|                                                 | Mean            | SD   | Mean | SD   | Mean | SD   |            |      |      |
| Al                                              | 0.02            | 0.04 | 0.02 | 0.04 | 0.00 | 0.00 | 0.00       | 0.00 | 0.00 |
| Co                                              | 0.34            | 0.07 | 0.34 | 0.07 | 0.00 | 0.00 | 0.44       | 0.00 | 0.48 |
| Li                                              | 18.6            | 0.30 | 0.13 | 0.22 | 18.7 | 0.10 | 19.0       | 0.00 | 19.0 |
| Mn                                              | 3.11            | 0.15 | 3.11 | 0.15 | 0.00 | 0.00 | 3.08       | 3.08 | 0.00 |
| Ni                                              | 9.40            | 0.28 | 2.46 | 0.41 | 6.94 | 0.62 | 10.0       | 0.00 | 10.4 |

  

| Data associated to Fig. 8A-iii 50 % v/v leachate |                 |      |      |      |      |      |            |      |      |
|--------------------------------------------------|-----------------|------|------|------|------|------|------------|------|------|
| Element                                          | Cell-only (n=3) |      |      |      |      |      | MOPS (n=1) |      |      |
|                                                  | T2A             |      | T2B  |      | T2C  |      | T2A        | T2B  | T2C  |
|                                                  | Mean            | SD   | Mean | SD   | Mean | SD   |            |      |      |
| Al                                               | 1.69            | 0.12 | 1.02 | 0.17 | 0.67 | 0.11 | 1.90       | 1.00 | 0.90 |
| Co                                               | 1.68            | 0.07 | 1.51 | 0.16 | 0.17 | 0.19 | 1.89       | 0.02 | 1.87 |
| Li                                               | 37.3            | 0.30 | 0.18 | 0.16 | 37.3 | 0.70 | 38.1       | 0.37 | 37.7 |
| Mn                                               | 8.21            | 0.22 | 8.21 | 0.22 | 0.00 | 0.00 | 8.64       | 8.64 | 0.00 |
| Ni                                               | 20.1            | 0.1  | 4.86 | 1.28 | 15.2 | 1.30 | 21.7       | 0.08 | 21.6 |

  

| Data associated to Fig. 8A-iv 50 % v/v leachate |                     |      |      |      |      |      |             |      |      |
|-------------------------------------------------|---------------------|------|------|------|------|------|-------------|------|------|
| Element                                         | Whole culture (n=3) |      |      |      |      |      | Media (n=1) |      |      |
|                                                 | T2A                 |      | T2B  |      | T2C  |      | T2A         | T2B  | T2C  |
|                                                 | Mean                | SD   | Mean | SD   | Mean | SD   |             |      |      |
| Al                                              | 1.78                | 0.04 | 0.87 | 0.18 | 0.91 | 0.14 | 1.71        | 0.43 | 1.28 |
| Co                                              | 1.54                | 0.04 | 1.43 | 0.01 | 0.11 | 0.04 | 1.86        | 0.00 | 1.96 |
| Li                                              | 37.7                | 0.80 | 0.22 | 0.38 | 37.8 | 0.30 | 37.2        | 0.00 | 37.7 |
| Mn                                              | 8.79                | 1.30 | 8.79 | 1.30 | 0.00 | 0.00 | 9.19        | 6.47 | 2.72 |
| Ni                                              | 19.4                | 0.60 | 7.59 | 0.93 | 11.8 | 0.40 | 21.2        | 0.00 | 21.7 |

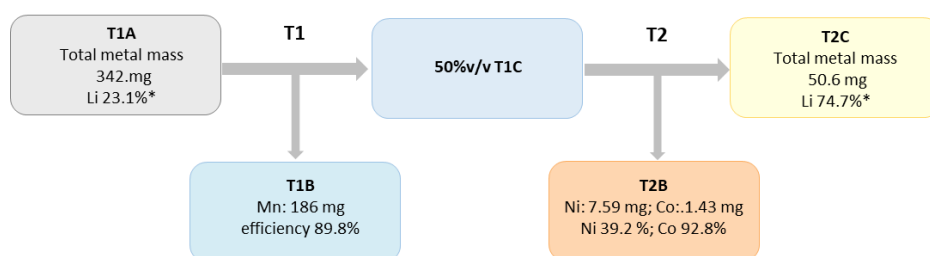

**Fig.S9** Mass flow of bioprocess with B1C leachate 0.5 M H<sub>2</sub>SO<sub>4</sub> (10%v/v leachate + 90 v/v bacterial culture) associated to Fig. 8 A i) B1C-0.5M - iv) 50% v/v (T1C). \* % (mass Li/ total metal mass)

**Table S4.** Metal concentration (ppm) in the different fractions during T1 and T2 of leachate A1C 0.5 M H<sub>2</sub>SO<sub>4</sub>

| Data associated to Fig. 8B-i |      |      |      |             |
|------------------------------|------|------|------|-------------|
| Element                      | T1A  | T1B  | T1C  | Removal (%) |
| Al                           | 10.8 | 10.8 | 0.00 | 100         |
| Co                           | 142  | 53.5 | 88.2 | 38          |
| Li                           | 154  | 1.00 | 153  | 1           |
| Mn                           | 160  | 155  | 5.10 | 97          |
| Ni                           | 286  | 25.1 | 261  | 9           |

  

| Data associated to Fig. 8B-ii 25 % v/v leachate |                 |      |      |      |      |      |            |      |      |
|-------------------------------------------------|-----------------|------|------|------|------|------|------------|------|------|
| Element                                         | Cell-only (n=3) |      |      |      |      |      | MOPS (n=1) |      |      |
|                                                 | T2A             |      | T2B  |      | T2C  |      | T2A        | T2B  | T2C  |
|                                                 | Mean            | SD   | Mean | SD   | Mean | SD   |            |      |      |
| Al                                              | 0.00            | 0.00 | 0.00 | 0.00 | 0.00 | 0.00 | 0.00       | 0.00 | 0.00 |
| Co                                              | 25.6            | 0.28 | 4.28 | 0.99 | 21.4 | 0.76 | 25.6       | 0.00 | 26.1 |
| Li                                              | 40.1            | 0.37 | 0.00 | 0.00 | 40.8 | 0.14 | 39.9       | 0.00 | 40.6 |
| Mn                                              | 0.11            | 0.03 | 0.11 | 0.03 | 0.00 | 0.00 | 0.23       | 0.14 | 0.09 |
| Ni                                              | 68.0            | 1.42 | 12.4 | 3.12 | 55.6 | 1.71 | 68.7       | 0.00 | 69.3 |

  

| Data associated to Fig. 8B-iii 50 % v/v leachate |                 |      |      |      |      |      |            |      |      |
|--------------------------------------------------|-----------------|------|------|------|------|------|------------|------|------|
| Element                                          | Cell-only (n=3) |      |      |      |      |      | MOPS (n=1) |      |      |
|                                                  | T2A             |      | T2B  |      | T2C  |      | T2A        | T2B  | T2C  |
|                                                  | Mean            | SD   | Mean | SD   | Mean | SD   |            |      |      |
| Al                                               | 0.00            | 0.00 | 0.00 | 0.00 | 0.00 | 0.00 | 0.00       | 0.00 | 0.00 |
| Co                                               | 49.9            | 0.41 | 4.36 | 0.23 | 45.5 | 0.64 | 50.1       | 0.00 | 51.5 |
| Li                                               | 81.2            | 0.66 | 0.00 | 0.00 | 81.6 | 0.7  | 81.4       | 0.00 | 82.7 |
| Mn                                               | 2.07            | 0.02 | 0.38 | 0.04 | 1.69 | 0.05 | 2.06       | 0.00 | 2.12 |
| Ni                                               | 139             | 1.05 | 11.5 | 1.48 | 127  | 1.15 | 140        | 0.00 | 145  |

  

| Data associated to Fig. 8B-iv 50 % v/v leachate |                     |      |      |      |      |      |             |      |      |
|-------------------------------------------------|---------------------|------|------|------|------|------|-------------|------|------|
| Element                                         | Whole culture (n=3) |      |      |      |      |      | Media (n=1) |      |      |
|                                                 | T2A                 |      | T2B  |      | T2C  |      | T2A         | T2B  | T2C  |
|                                                 | Mean                | SD   | Mean | SD   | Mean | SD   |             |      |      |
| Al                                              | 0.00                | 0.00 | 0.00 | 0.00 | 0.00 | 0.00 | 0.00        | 0.00 | 0.00 |
| Co                                              | 48.4                | 0.31 | 48.4 | 0.31 | 0.00 | 0.00 | 48.6        | 0.00 | 50.1 |
| Li                                              | 80.9                | 0.44 | 0.45 | 0.78 | 81.1 | 1.16 | 81.5        | 0.00 | 82.4 |
| Mn                                              | 1.96                | 0.02 | 0.14 | 0.04 | 1.83 | 0.05 | 1.94        | 0.00 | 2.02 |
| Ni                                              | 138                 | 0.38 | 133  | 2.32 | 5.39 | 2.12 | 139         | 0.00 | 143  |

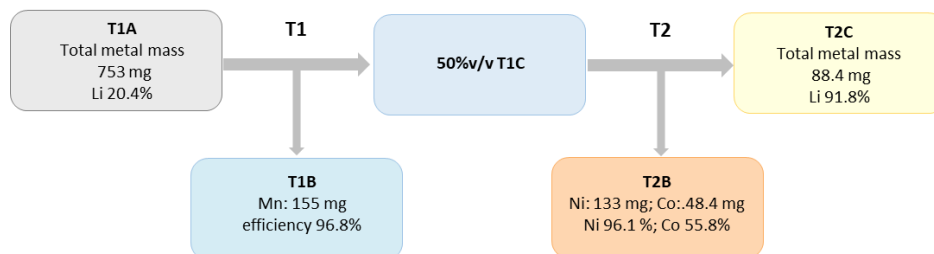

**Fig.S10** Mass flow of bioprocess with A1C leachate 0.5 M H<sub>2</sub>SO<sub>4</sub> (10%v/v leachate + 90 v/v bacterial culture) associated to Fig. 8 B i) A1C-0.5M - iv) 50% v/v (T1C). \* % (mass Li/ total metal mass)

**Table S5.** Metal concentration (ppm) in the different fractions during T1 and T2 of leachate A1C 0.1 M H<sub>2</sub>SO<sub>4</sub>

| Data associated to Fig. 8C-i |      |      |      |             |
|------------------------------|------|------|------|-------------|
| Element                      | T1A  | T1B  | T1C  | Removal (%) |
| Al                           | 0.00 | 0.00 | 0.00 | 0.00        |
| Co                           | 50.7 | 0.46 | 50.2 | 5.40        |
| Li                           | 59.3 | 0.00 | 59.9 | 1.50        |
| Mn                           | 57.9 | 51.5 | 6.39 | 89.7        |
| Ni                           | 94.8 | 0.00 | 96.1 | 2.80        |

  

| Data associated to Fig. 8C-ii 25 % v/v leachate |                 |      |      |      |      |      |            |      |      |
|-------------------------------------------------|-----------------|------|------|------|------|------|------------|------|------|
| Element                                         | Cell-only (n=3) |      |      |      |      |      | MOPS (n=1) |      |      |
|                                                 | T2A             |      | T2B  |      | T2C  |      | T2A        | T2B  | T2C  |
|                                                 | Mean            | SD   | Mean | SD   | Mean | SD   |            |      |      |
| Al                                              | 0.00            | 0.00 | 0.00 | 0.00 | 0.00 | 0.00 | 0.00       | 0.00 | 0.00 |
| Co                                              | 11.3            | 0.07 | 7.17 | 0.30 | 4.17 | 0.37 | 12.2       | 0.00 | 12.4 |
| Li                                              | 14.5            | 0.10 | 0.09 | 0.15 | 14.4 | 0.20 | 14.5       | 0.00 | 14.6 |
| Mn                                              | 0.00            | 0.00 | 0.00 | 0.00 | 0.00 | 0.00 | 0.00       | 0.00 | 0.00 |
| Ni                                              | 22.3            | 0.35 | 5.68 | 0.68 | 16.6 | 0.33 | 23.6       | 0.00 | 23.6 |

  

| Data associated to Fig. 8C-iii 50 % v/v leachate |                 |      |       |      |      |      |            |      |      |
|--------------------------------------------------|-----------------|------|-------|------|------|------|------------|------|------|
| Element                                          | Cell-only (n=3) |      |       |      |      |      | MOPS (n=1) |      |      |
|                                                  | T2A             |      | T2B   |      | T2C  |      | T2A        | T2B  | T2C  |
|                                                  | Mean            | SD   | Mean  | SD   | Mean | SD   |            |      |      |
| Al                                               | 0.00            | 0.00 | 0.00  | 0.00 | 0.00 | 0.00 | 0.00       | 0.00 | 0.00 |
| Co                                               | 24.1            | 0.75 | 12.20 | 2.63 | 11.9 | 2.13 | 26.1       | 0.29 | 25.8 |
| Li                                               | 27.7            | 0.82 | 0.07  | 0.06 | 27.8 | 0.52 | 28.9       | 0.35 | 28.5 |
| Mn                                               | 0.89            | 0.06 | 0.74  | 0.06 | 0.15 | 0.06 | 0.97       | 0.31 | 0.66 |
| Ni                                               | 46.1            | 1.59 | 7.91  | 2.12 | 38.2 | 1.50 | 49.3       | 0.53 | 48.8 |

  

| Data associated to Fig. 8C-iv 50 % v/v leachate |                     |      |       |      |      |      |             |      |      |
|-------------------------------------------------|---------------------|------|-------|------|------|------|-------------|------|------|
| Element                                         | Whole culture (n=3) |      |       |      |      |      | Media (n=1) |      |      |
|                                                 | T2A                 |      | T2B   |      | T2C  |      | T2A         | T2B  | T2C  |
|                                                 | Mean                | SD   | Mean  | SD   | Mean | SD   |             |      |      |
| Al                                              | 0.00                | 0.00 | 0.00  | 0.00 | 0.00 | 0.00 | 0.00        | 0.00 | 0.00 |
| Co                                              | 24.0                | 0.04 | 20.50 | 0.33 | 3.50 | 0.33 | 24.6        | 0.00 | 25.1 |
| Li                                              | 28.3                | 0.10 | 0.00  | 0.00 | 28.8 | 0.08 | 27.5        | 0.00 | 28.2 |
| Mn                                              | 0.88                | 0.05 | 0.23  | 0.02 | 0.65 | 0.02 | 1.63        | 0.14 | 1.49 |
| Ni                                              | 46.4                | 0.09 | 23.80 | 1.92 | 22.5 | 1.97 | 48.6        | 0.38 | 48.2 |

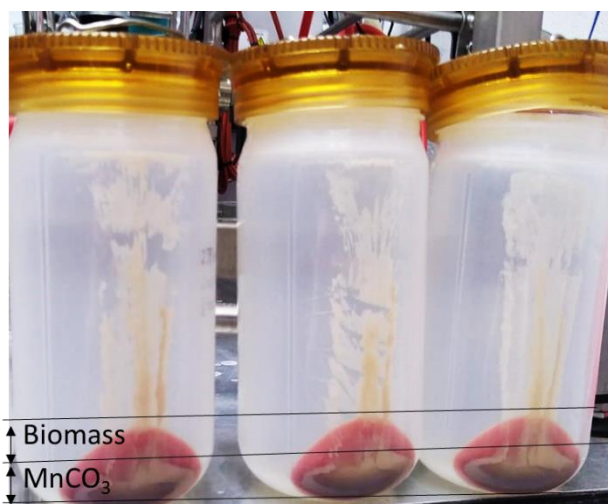

**Fig. S11** Bioprecipitated Mn as  $\text{MnCO}_3$  (beige layer) below the biomass layer (pink) after centrifugation to separate the solid and dissolved fractions.

## References

- 1 M. J. Capeness, L. Imrie, L. F. Mühlbauer, T. Le Bihan and L. E. Horsfall, *Microbiology*, 2019, **165**, 1282–1294.
- 2 L. J. Hauser, M. L. Land, S. D. Brown, F. Larimer, K. L. Keller, B. J. Rapp-Giles, M. N. Price, M. Lin, D. C. Bruce, J. C. Detter, R. Tapia, C. S. Han, L. A. Goodwin, J.-F. Cheng, S. Pitluck, A. Copeland, S. Lucas, M. Nolan, A. L. Lapidus, A. V. Palumbo and J. D. Wall, *J. Bacteriol.*, 2011, **193**, 4268–4269.
- 3 Y. Liu, A. Serrano, V. Wyman, E. Marcellin, G. Southam, J. Vaughan and D. Villa-Gomez, *J. Hazard. Mater.*, 2021, **402**, 123506.
- 4 H. Dulay, M. Tabares, K. Kashefi and G. Reguera, *Front. Microbiol.*, 2020, **11**, 2992.
- 5 W. M. B. L. Vallee, *Methods Enzymol.*, 1993, **226**, 52–71.
- 6 B. Bennett, in *Metals in Biology. Biological Magnetic Resonance, vol 29.*, eds. G. Hanson and L. Berliner, Springer New York, New York, NY, 2010, pp. 345–370.
- 7 T. Schmidt and H. G. Schlegel, *J. Bacteriol.*, 1994, **176**, 7045–7054.
- 8 A. E. Otwell, R. W. Sherwood, S. Zhang, O. D. Nelson, Z. Li, H. Lin, S. J. Callister and R. E. Richardson, *Environ. Microbiol.*, 2015, **17**, 1977–1990.
- 9 M. Arenas-Salinas, J. I. Vargas-Pérez, W. Morales, C. Pinto, P. Muñoz-Díaz, F. A. Cornejo, B. Pugin, J. M. Sandoval, W. A. Díaz-Vásquez, C. Muñoz-Villagrán, F. Rodríguez-Rojas, E. H. Morales, C. C. Vásquez and F. A. Arenas, *Front. Microbiol.*, 2016, **7**, 1160.
- 10 J. Y. Lee, J. G. Yang, D. Zhitnitsky, O. Lewinson and D. C. Rees, *Science.*, 2014, **343**, 1133–1136.
